# Supplementary material
Source: PubMed Central journal article supplement (PMC4249322)
Supplement: IAI.02153-14_zii999090922so1.pdf [file IAI.02153-14_zii999090922so1.pdf]

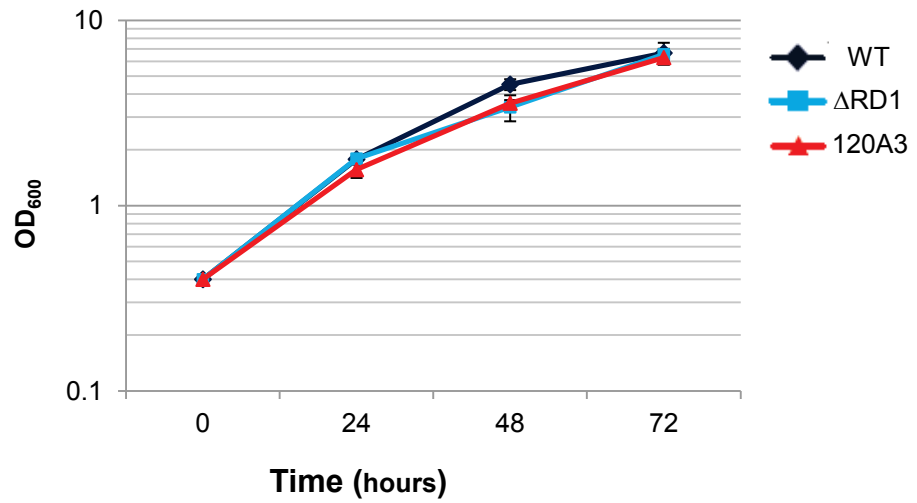

**Figure S1: The 120A3 strain does not have a growth defect *in vitro*.** Strains were grown until late exponential phase, diluted to an optical density ( $OD_{600}$ ) of 0.4 and grown for 72 hours in Middlebrook 7H9. Growth curves were generated by  $OD_{600}$  measurements and plotted against time.

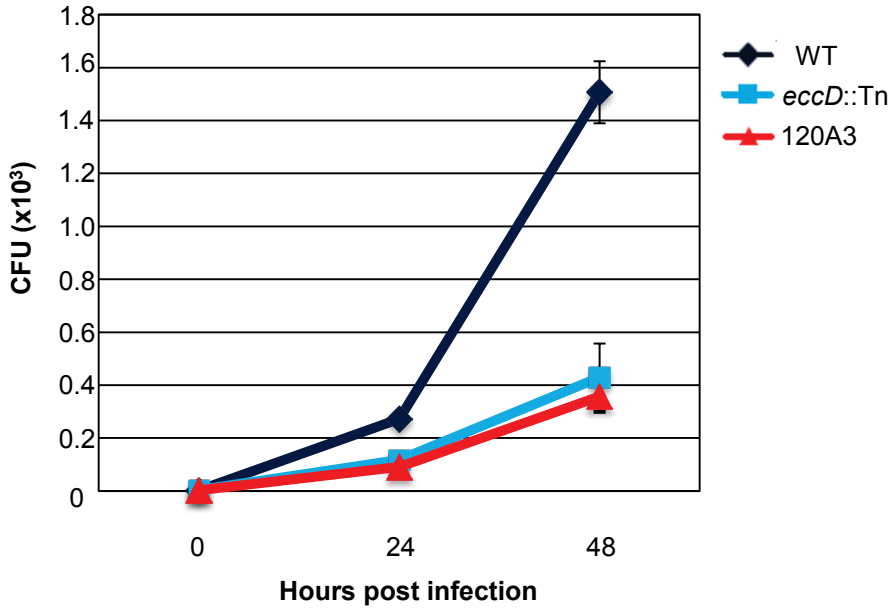

**Figure S2: The 120A3 strain is attenuated for growth in RAW246.7 cells.** RAW246.7 cells were infected at an MOI of 1 for 2 hours after which cells were treated with gentamicin (100  $\mu\text{g}/\text{mL}$ ) for two hours. Treated cells were washed and resuspended in fresh media. Bacteria were harvested and plated for Colony Forming Units (CFU) at the indicated time points. Error bars represent the standard deviation; experiments were performed in triplicate.

**Figure S3: MRM transitions used in this study**

| N  | Q1 (m/z) | Q3 (m/z) | Dwell (ms) | Protein_Peptide_Transition#     | CE (v) |
|----|----------|----------|------------|---------------------------------|--------|
| 1  | 571.817  | 943.532  | 5          | CFP10_GAAGTAAQAAVVR.T1          | 33.6   |
| 2  | 571.817  | 785.463  | 5          | CFP10_GAAGTAAQAAVVR.T2          | 33.6   |
| 3  | 571.817  | 714.426  | 5          | CFP10_GAAGTAAQAAVVR.T3          | 33.6   |
| 4  | 673.336  | 945.49   | 8          | CFP10_TQIDQVESTAGSLQAQWR.T1     | 38.7   |
| 5  | 673.336  | 688.352  | 8          | CFP10_TQIDQVESTAGSLQAQWR.T2     | 38.7   |
| 6  | 673.336  | 888.469  | 8          | CFP10_TQIDQVESTAGSLQAQWR.T3     | 38.7   |
| 7  | 827.854  | 999.438  | 8          | CFP10_ADDEQQQALSSQMGF.T1        | 46.4   |
| 8  | 827.854  | 886.354  | 8          | CFP10_ADDEQQQALSSQMGF.T2        | 46.4   |
| 9  | 827.854  | 840.392  | 8          | CFP10_ADDEQQQALSSQMGF.T3        | 46.4   |
| 10 | 829.406  | 915.501  | 10         | ESAT6_GVQQNWDSTAQELNNSLQNLAR.T1 | 46.5   |
| 11 | 829.406  | 801.458  | 10         | ESAT6_GVQQNWDSTAQELNNSLQNLAR.T2 | 46.5   |
| 12 | 829.406  | 714.426  | 10         | ESAT6_GVQQNWDSTAQELNNSLQNLAR.T3 | 46.5   |
| 13 | 619.322  | 956.468  | 10         | EspB_SQPQTVTVDQQEILNR.T1        | 35     |
| 14 | 619.322  | 644.373  | 12         | EspB_SQPQTVTVDQQEILNR.T2        | 35     |
| 15 | 619.322  | 772.431  | 12         | EspB_SQPQTVTVDQQEILNR.T3        | 35     |
| 16 | 465.9    | 682.3    | 15         | ESAT6_LAAAWGSGSEAYR.Light.T1    | 20     |
| 17 | 465.9    | 538.3    | 15         | ESAT6_LAAAWGSGSEAYR.Light.T2    | 20     |
| 18 | 465.9    | 769.35   | 15         | ESAT6_LAAAWGSGSEAYR.Light.T3    | 20     |
| 19 | 469.227  | 692.315  | 15         | ESAT6_LAAAWGSGSEAYR.Heavy.T1    | 20     |
| 20 | 469.227  | 548.262  | 15         | ESAT6_LAAAWGSGSEAYR.Heavy.T2    | 20     |
| 21 | 469.227  | 779.347  | 15         | ESAT6_LAAAWGSGSEAYR.Heavy.T3    | 20     |
| 22 | 508.611  | 556.32   | 12         | GroES_EKPQEGTVVAVGPGR.Light.T1  | 22     |
| 23 | 508.611  | 869.436  | 12         | GroES_EKPQEGTVVAVGPGR.Light.T2  | 22     |
| 24 | 508.611  | 655.389  | 12         | GroES_EKPQEGTVVAVGPGR.Light.T3  | 22     |
| 25 | 511.944  | 566.32   | 12         | GroES_EKPQEGTVVAVGPGR.Heavy.T1  | 22     |
| 26 | 511.944  | 869.436  | 12         | GroES_EKPQEGTVVAVGPGR.Heavy.T2  | 22     |
| 27 | 511.944  | 665.389  | 12         | GroES_EKPQEGTVVAVGPGR.Heavy.T3  | 22     |
| 28 | 644.987  | 951.537  | 12         | EsxN_Ac-TINYQFGDVDAHGALIR.T2    | 37     |
| 29 | 644.987  | 737.442  | 12         | EsxN_Ac-TINYQFGDVDAHGALIR.T3    | 37     |
| 30 | 665.393  | 903.53   | 12         | EspF_Ac-TGLLNVPSPFLK.T1         | 36     |
| 31 | 665.393  | 1016.614 | 12         | EspF_Ac-TGLLNVPSPFLK.T2         | 36     |
| 32 | 665.393  | 690.419  | 12         | EspF_Ac-TGLLNVPSPFLK.T3         | 36     |
| 33 | 949.484  | 998.479  | 12         | EspB_Ac-SQPQTVTVDQQEILNR.T1     | 48     |
| 34 | 949.484  | 820.934  | 12         | EspB_Ac-SQPQTVTVDQQEILNR.T2     | 48     |
| 35 | 949.484  | 900.49   | 12         | EspB_Ac-SQPQTVTVDQQEILNR.T3     | 48     |
| 36 | 630.7    | 852.469  | 12         | EsxN_TINYQFGDVDAHGALIR.T1       | 36     |
| 37 | 630.7    | 951.537  | 12         | EsxN_TINYQFGDVDAHGALIR.T2       | 36     |
| 38 | 630.7    | 737.442  | 12         | EsxN_TINYQFGDVDAHGALIR.T3       | 36     |
| 39 | 425.226  | 552.283  | 12         | 5455_EspK_GIPRPTGEYAGR.T1       | 26.3   |
| 40 | 425.226  | 850.405  | 12         | 5455_EspK_GIPRPTGEYAGR.T2       | 26.3   |
| 41 | 425.226  | 466.241  | 12         | 5455_EspK_GIPRPTGEYAGR.T3       | 26.3   |
| 42 | 526.258  | 652.254  | 12         | 5455_EspK_VLHLFTDVMDAcR.T1      | 31.3   |
| 43 | 526.258  | 826.446  | 12         | 5455_EspK_VLHLFTDVMDAcR.T2      | 31.3   |
| 44 | 526.258  | 925.514  | 12         | 5455_EspK_VLHLFTDVMDAcR.T3      | 31.3   |
| 45 | 471.808  | 814.515  | 12         | 5455_EspK_KAAIASLIR.T1          | 28.6   |
| 46 | 471.808  | 743.477  | 12         | 5455_EspK_KAAIASLIR.T2          | 28.6   |
| 47 | 471.808  | 672.44   | 12         | 5455_EspK_KAAIASLIR.T3          | 28.6   |
| 48 | 552.982  | 614.874  | 12         | EspB_ADLEPVNPPKPPAAIK.T1        | 32.6   |
| 49 | 552.982  | 918.577  | 12         | EspB_ADLEPVNPPKPPAAIK.T2        | 32.6   |
| 50 | 552.982  | 735.938  | 12         | EspB_ADLEPVNPPKPPAAIK.T3        | 32.6   |
| 51 | 483.928  | 805.42   | 12         | EspB_GHPTLADIVELER.T1           | 29.2   |
| 52 | 483.928  | 692.336  | 12         | EspB_GHPTLADIVELER.T2           | 29.2   |
| 53 | 483.928  | 645.357  | 12         | EspB_GHPTLADIVELER.T3           | 29.2   |
| 54 | 662.325  | 954.442  | 12         | EspB_VAAAGESDFTDLK.T1           | 38.1   |
| 55 | 662.325  | 825.399  | 12         | EspB_VAAAGESDFTDLK.T2           | 38.1   |
| 56 | 662.325  | 738.367  | 12         | EspB_VAAAGESDFTDLK.T3           | 38.1   |
| 57 | 595.312  | 917.505  | 12         | EspF_NSAGTGLQGVGTGK.T1          | 34.8   |
| 58 | 595.312  | 988.542  | 12         | EspF_NSAGTGLQGVGTGK.T2          | 34.8   |
| 59 | 595.312  | 1075.574 | 12         | EspF_NSAGTGLQGVGTGK.T3          | 34.8   |

| N   | Q1 (m/z) | Q3 (m/z) | Dwell (ms) | Protein_Peptide_Transition#                           | CE (v) |
|-----|----------|----------|------------|-------------------------------------------------------|--------|
| 60  | 644.387  | 903.53   | 12         | EspF_TGLLNVPVPSFLK.T1                                 | 36     |
| 61  | 644.387  | 1016.614 | 12         | EspF_TGLLNVPVPSFLK.T2                                 | 36     |
| 62  | 644.387  | 690.419  | 12         | EspF_TGLLNVPVPSFLK.T3                                 | 36     |
| 63  | 574.307  | 989.537  | 12         | EspF_SATNVVSGIGSR.T1                                  | 33.7   |
| 64  | 574.307  | 888.49   | 12         | EspF_SATNVVSGIGSR.T2                                  | 33.7   |
| 65  | 574.307  | 1060.574 | 12         | EspF_SATNVVSGIGSR.T3                                  | 33.7   |
| 66  | 608.32   | 829.453  | 12         | PPE68_GESLPGAGGTLTR.T1                                | 35.4   |
| 67  | 608.32   | 732.4    | 12         | PPE68_GESLPGAGGTLTR.T2                                | 35.4   |
| 68  | 608.32   | 942.537  | 12         | PPE68_GESLPGAGGTLTR.T3                                | 35.4   |
| 69  | 753.365  | 892.416  | 12         | PPE68_LNSLGEAWTGGGSEK.T1                              | 42.7   |
| 70  | 753.365  | 821.379  | 12         | PPE68_LNSLGEAWTGGGSEK.T2                              | 42.7   |
| 71  | 753.365  | 1191.564 | 12         | PPE68_LNSLGEAWTGGGSEK.T3                              | 42.7   |
| 72  | 685.85   | 964.55   | 12         | GROES_YGGEEYLILSAR.T1                                 | 39.3   |
| 73  | 685.85   | 835.5    | 12         | GROES_YGGEEYLILSAR.T2                                 | 39.3   |
| 74  | 888.92   | 1217.58  | 12         | GroEL2_DETTIVEGAGDSDAIAGR.T1                          | 45     |
| 75  | 888.92   | 1118.51  | 12         | GroEL2_DETTIVEGAGDSDAIAGR.T2                          | 45     |
| 76  | 519.782  | 838.478  | 12         | EspJ_AEPLAVDPAAR.T1                                   | 31     |
| 77  | 519.782  | 741.425  | 12         | EspJ_AEPLAVDPAAR.T2                                   | 31     |
| 78  | 519.782  | 628.341  | 12         | EspJ_AEPLAVDPAAR.T3                                   | 31     |
| 79  | 472.894  | 680.361  | 12         | EspJ_TASSMSTAADIYAK.T1                                | 28.6   |
| 80  | 472.894  | 609.324  | 12         | EspJ_TASSMSTAADIYAK.T2                                | 28.6   |
| 81  | 472.894  | 939.478  | 12         | EspJ_TASSMSTAADIYAK.T3                                | 28.6   |
| 82  | 573.295  | 1220.622 | 12         | 2929_TPDAIAQDIHTTLGEK.Heavy.3T1                       | 30     |
| 83  | 573.295  | 1149.585 | 12         | 2929_TPDAIAQDIHTTLGEK.Heavy.3T2                       | 30     |
| 84  | 573.295  | 1021.526 | 12         | 2929_TPDAIAQDIHTTLGEK.Heavy.3T3                       | 30     |
| 85  | 570.625  | 1212.622 | 12         | 2929_TPDAIAQDIHTTLGEK.Light.3T1                       | 30     |
| 86  | 570.625  | 1141.585 | 12         | 2929_TPDAIAQDIHTTLGEK.Light.3T2                       | 30     |
| 87  | 570.625  | 1013.526 | 12         | 2929_TPDAIAQDIHTTLGEK.Light.3T3                       | 30     |
| 88  | 1137.36  | 1203.1   | 20         | ESAT6_TEQQWNFAGIEAASSAIQGNVTSISHLLDEGK.Heavy.2y24     | 50     |
| 89  | 1137.36  | 1238.4   | 20         | ESAT6_TEQQWNFAGIEAASSAIQGNVTSISHLLDEGK.Heavy.2y25     | 50     |
| 90  | 1137.36  | 1369.2   | 20         | ESAT6_TEQQWNFAGIEAASSAIQGNVTSISHLLDEGK.Heavy.2y27     | 50     |
| 91  | 1137.36  | 1461.8   | 20         | ESAT6_TEQQWNFAGIEAASSAIQGNVTSISHLLDEGK.Heavy.2y28     | 50     |
| 92  | 1137.36  | 1311.7   | 20         | ESAT6_TEQQWNFAGIEAASSAIQGNVTSISHLLDEGK.Heavy.2y26     | 50     |
| 93  | 1137.36  | 1477.3   | 20         | ESAT6_TEQQWNFAGIEAASSAIQGNVTSISHLLDEGK.Heavy.y14      | 50     |
| 94  | 1134.693 | 1199.1   | 20         | ESAT6_TEQQWNFAGIEAASSAIQGNVTSISHLLDEGK.Light.2y24     | 50     |
| 95  | 1134.693 | 1234.73  | 20         | ESAT6_TEQQWNFAGIEAASSAIQGNVTSISHLLDEGK.Light.2y25     | 50     |
| 96  | 1134.693 | 1365.2   | 20         | ESAT6_TEQQWNFAGIEAASSAIQGNVTSISHLLDEGK.Light.2y27     | 50     |
| 97  | 1134.693 | 1458.2   | 20         | ESAT6_TEQQWNFAGIEAASSAIQGNVTSISHLLDEGK.Light.2y28     | 50     |
| 98  | 1134.693 | 1308.2   | 20         | ESAT6_TEQQWNFAGIEAASSAIQGNVTSISHLLDEGK.Light.2y26     | 50     |
| 99  | 1134.693 | 1469.8   | 20         | ESAT6_TEQQWNFAGIEAASSAIQGNVTSISHLLDEGK.Light.y14      | 50     |
| 100 | 1151.2   | 1203.1   | 20         | [Ac]ESAT6_TEQQWNFAGIEAASSAIQGNVTSISHLLDEGK.Heavy.2y24 | 50     |
| 101 | 1151.2   | 1238.4   | 20         | [Ac]ESAT6_TEQQWNFAGIEAASSAIQGNVTSISHLLDEGK.Heavy.2y25 | 50     |
| 102 | 1151.2   | 1369.2   | 20         | [Ac]ESAT6_TEQQWNFAGIEAASSAIQGNVTSISHLLDEGK.Heavy.2y27 | 50     |
| 103 | 1151.2   | 1461.8   | 20         | [Ac]ESAT6_TEQQWNFAGIEAASSAIQGNVTSISHLLDEGK.Heavy.2y28 | 50     |
| 104 | 1151.2   | 1311.7   | 20         | [Ac]ESAT6_TEQQWNFAGIEAASSAIQGNVTSISHLLDEGK.Heavy.2y26 | 50     |
| 105 | 1151.2   | 1477.3   | 20         | [Ac]ESAT6_TEQQWNFAGIEAASSAIQGNVTSISHLLDEGK.Heavy.y14  | 50     |
| 106 | 1148.6   | 1199.1   | 20         | [Ac]ESAT6_TEQQWNFAGIEAASSAIQGNVTSISHLLDEGK.Light.2y24 | 50     |
| 107 | 1148.6   | 1234.73  | 20         | [Ac]ESAT6_TEQQWNFAGIEAASSAIQGNVTSISHLLDEGK.Light.2y25 | 50     |
| 108 | 1148.6   | 1365.2   | 20         | [Ac]ESAT6_TEQQWNFAGIEAASSAIQGNVTSISHLLDEGK.Light.2y27 | 50     |
| 109 | 1148.6   | 1458.2   | 20         | [Ac]ESAT6_TEQQWNFAGIEAASSAIQGNVTSISHLLDEGK.Light.2y28 | 50     |
| 110 | 1148.6   | 1308.2   | 20         | [Ac]ESAT6_TEQQWNFAGIEAASSAIQGNVTSISHLLDEGK.Light.2y26 | 50     |
| 111 | 1148.6   | 1469.8   | 20         | [Ac]ESAT6_TEQQWNFAGIEAASSAIQGNVTSISHLLDEGK.Light.y14  | 50     |

Figure S4: Raw data for absolute quantification of EsxA using heavy isotope dilution

Cell Lysate

ESAT6\_LAAAWGSGSSEAYR.T1

| Sample Name    | Light    | AQUA     | L/H Ratio | Stats     |         |      |
|----------------|----------|----------|-----------|-----------|---------|------|
|                | Area     | Area     |           | Average   | StDev   | % CV |
| 120A3 Pellet A | 3.46E+05 | 1.84E+05 | 1.88E+00  | 1.73E+00  | Average |      |
| 120A3 Pellet A | 5.06E+05 | 3.00E+05 | 1.69E+00  | 0.1428262 | StDev   |      |
| 120A3 Pellet A | 5.98E+05 | 3.72E+05 | 1.61E+00  | 8.3%      | % CV    |      |
| 3871 Pellet A  | 1.56E+05 | 4.13E+05 | 3.77E-01  | 4.05E-01  | Average |      |
| 3871 Pellet A  | 1.51E+05 | 3.76E+05 | 4.01E-01  | 0.0295697 | StDev   |      |
| 3871 Pellet A  | 1.52E+05 | 3.49E+05 | 4.36E-01  | 7.3%      | % CV    |      |
| 3877 Pellet A  | 6.71E+05 | 2.81E+05 | 2.39E+00  | 2.33E+00  | Average |      |
| 3877 Pellet A  | 8.43E+05 | 3.48E+05 | 2.42E+00  | 0.137512  | StDev   |      |
| 3877 Pellet A  | 8.59E+05 | 3.96E+05 | 2.17E+00  | 5.9%      | % CV    |      |
| C3 Pellet A    | 6.50E+05 | 4.38E+05 | 1.48E+00  | 1.45E+00  | Average |      |
| C3 Pellet A    | 6.59E+05 | 4.60E+05 | 1.43E+00  | 0.0337578 | StDev   |      |
| C3 Pellet A    | 5.86E+05 | 4.12E+05 | 1.42E+00  | 2.3%      | % CV    |      |
| WT Pellet A    | 4.70E+05 | 2.76E+05 | 1.70E+00  | 1.69E+00  | Average |      |
| WT Pellet A    | 6.43E+05 | 3.86E+05 | 1.67E+00  | 0.0206955 | StDev   |      |
| WT Pellet A    | 7.01E+05 | 4.11E+05 | 1.71E+00  | 1.2%      | % CV    |      |

ESAT6\_TEQQWNFAGIEAASSAIQGNVTSISHLLDEGK2y27

| Sample Name    | Light    | AQUA     | L/H Ratio | Stats     |         |      |
|----------------|----------|----------|-----------|-----------|---------|------|
|                | Area     | Area     |           | Average   | StDev   | % CV |
| 120A3 Pellet A | 4.70E+04 | 4.25E+04 | 1.10E+00  | 8.83E-01  | Average |      |
| 120A3 Pellet A | 4.58E+04 | 5.20E+04 | 8.81E-01  | 0.2206008 | StDev   |      |
| 120A3 Pellet A | 4.19E+04 | 6.31E+04 | 6.63E-01  | 25.0%     | % CV    |      |
| 3871 Pellet A  | 1.59E+04 | 6.98E+04 | 2.27E-01  | 2.27E-01  | Average |      |
| 3871 Pellet A  | 1.39E+04 | 5.75E+04 | 2.41E-01  | 0.0140277 | StDev   |      |
| 3871 Pellet A  | 1.34E+04 | 6.30E+04 | 2.13E-01  | 6.2%      | % CV    |      |
| 3877 Pellet A  | 3.75E+04 | 4.89E+04 | 7.67E-01  | 8.93E-01  | Average |      |
| 3877 Pellet A  | 3.83E+04 | 3.94E+04 | 9.74E-01  | 0.1102962 | StDev   |      |
| 3877 Pellet A  | 5.15E+04 | 5.50E+04 | 9.37E-01  | 12.4%     | % CV    |      |
| C3 Pellet A    | 6.39E+04 | 8.18E+04 | 7.81E-01  | 9.64E-01  | Average |      |
| C3 Pellet A    | 5.32E+04 | 6.82E+04 | 7.80E-01  | 0.3184221 | StDev   |      |
| C3 Pellet A    | 6.49E+04 | 4.87E+04 | 1.33E+00  | 33.0%     | % CV    |      |
| WT Pellet A    | 5.62E+04 | 3.31E+04 | 1.70E+00  | 1.41E+00  | Average |      |
| WT Pellet A    | 5.03E+04 | 5.36E+04 | 9.39E-01  | 0.4128215 | StDev   |      |
| WT Pellet A    | 5.34E+04 | 3.33E+04 | 1.60E+00  | 29.2%     | % CV    |      |

ESAT6\_ActEQQWNFAGIEAASSAIQGNVTSISHLLDEGK2y27

| Sample Name    | Light    | AQUA     | L/H Ratio | Stats     |         |      |
|----------------|----------|----------|-----------|-----------|---------|------|
|                | Area     | Area     |           | Average   | StDev   | % CV |
| 120A3 Pellet A | 7.24E+04 | 8.65E+04 | 8.36E-01  | 7.32E-01  | Average |      |
| 120A3 Pellet A | 6.42E+04 | 9.16E+04 | 7.02E-01  | 0.0924124 | StDev   |      |
| 120A3 Pellet A | 7.93E+04 | 1.20E+05 | 6.59E-01  | 12.6%     | % CV    |      |
| 3871 Pellet A  | 3.32E+04 | 1.08E+05 | 3.09E-01  | 2.61E-01  | Average |      |
| 3871 Pellet A  | 3.25E+04 | 1.32E+05 | 2.46E-01  | 0.0422904 | StDev   |      |
| 3871 Pellet A  | 2.41E+04 | 1.05E+05 | 2.28E-01  | 16.2%     | % CV    |      |
| 3877 Pellet A  | 6.99E+04 | 8.24E+04 | 8.48E-01  | 8.00E-01  | Average |      |
| 3877 Pellet A  | 6.71E+04 | 8.63E+04 | 7.78E-01  | 0.0421141 | StDev   |      |
| 3877 Pellet A  | 7.63E+04 | 9.87E+04 | 7.73E-01  | 5.3%      | % CV    |      |
| C3 Pellet A    | 6.73E+04 | 9.91E+04 | 6.79E-01  | 7.17E-01  | Average |      |
| C3 Pellet A    | 5.94E+04 | 8.60E+04 | 6.91E-01  | 0.0559386 | StDev   |      |
| C3 Pellet A    | 5.64E+04 | 7.22E+04 | 7.82E-01  | 7.8%      | % CV    |      |
| WT Pellet A    | 3.05E+04 | 7.23E+04 | 4.21E-01  | 4.43E-01  | Average |      |
| WT Pellet A    | 3.61E+04 | 7.27E+04 | 4.96E-01  | 0.0462078 | StDev   |      |
| WT Pellet A    | 3.38E+04 | 8.21E+04 | 4.12E-01  | 10.4%     | % CV    |      |

GroES\_EKPQEGTVWAVGPR.T1

| Sample Name    | Light    | AQUA     | L/H Ratio | Stats     |         |      |
|----------------|----------|----------|-----------|-----------|---------|------|
|                | Area     | Area     |           | Average   | StDev   | % CV |
| 120A3 Pellet A | 5.85E+06 | 2.42E+06 | 2.42E+00  | 2.66E+00  | Average |      |
| 120A3 Pellet A | 1.25E+07 | 4.53E+06 | 2.77E+00  | 0.2092599 | StDev   |      |
| 120A3 Pellet A | 1.47E+07 | 5.26E+06 | 2.79E+00  | 7.9%      | % CV    |      |
| 3871 Pellet A  | 1.75E+07 | 6.21E+06 | 2.82E+00  | 2.81E+00  | Average |      |
| 3871 Pellet A  | 1.70E+07 | 6.01E+06 | 2.83E+00  | 0.0290051 | StDev   |      |
| 3871 Pellet A  | 1.61E+07 | 5.79E+06 | 2.78E+00  | 1.0%      | % CV    |      |
| 3877 Pellet A  | 1.03E+07 | 3.82E+06 | 2.68E+00  | 2.79E+00  | Average |      |
| 3877 Pellet A  | 1.71E+07 | 6.07E+06 | 2.82E+00  | 0.0951943 | StDev   |      |
| 3877 Pellet A  | 1.89E+07 | 6.59E+06 | 2.87E+00  | 3.4%      | % CV    |      |
| C3 Pellet A    | 1.36E+07 | 6.26E+06 | 2.17E+00  | 2.26E+00  | Average |      |
| C3 Pellet A    | 1.57E+07 | 6.96E+06 | 2.26E+00  | 0.0883385 | StDev   |      |
| C3 Pellet A    | 1.54E+07 | 6.53E+06 | 2.35E+00  | 3.9%      | % CV    |      |
| WT Pellet A    | 7.24E+06 | 3.36E+06 | 2.15E+00  | 2.16E+00  | Average |      |
| WT Pellet A    | 1.29E+07 | 6.12E+06 | 2.10E+00  | 0.0629123 | StDev   |      |
| WT Pellet A    | 1.42E+07 | 6.40E+06 | 2.23E+00  | 2.9%      | % CV    |      |

Correction Factor vs GroES

|          |          |       |
|----------|----------|-------|
| 120A3 is | 1.23E+00 | of WT |
| 3871 is  | 1.30E+00 | of WT |
| 3877 is  | 1.29E+00 | of WT |
| C3 is    | 1.05E+00 | of WT |
| WT is    | 1.00E+00 | of WT |

| Peptide    | Stock | Dil | Load (ul) | *25ul resusp |           |
|------------|-------|-----|-----------|--------------|-----------|
|            |       |     |           | pmol/tube    | Oncolumn* |
| GroES      | 130uM | 500 | 5         | 1.3          | 0.13      |
| E6internal | 142uM | 500 | 5         | 1.42         | 0.142     |

| Sample Name    | Absolute Quant<br>ESAT6i | in fmol/800ng lysate |          | E6i corrected<br>to GroES |        | Units to Table<br>fmol /ug CF |         |
|----------------|--------------------------|----------------------|----------|---------------------------|--------|-------------------------------|---------|
|                |                          | GroES                |          | GroES                     |        |                               |         |
| 120A3 Pellet A | 2.67E+02                 | 244.97               | 314.15   | 345.50                    | 199.11 | 248.89                        | 82.93%  |
| 120A3 Pellet A | 2.39E+02                 | 20.28                | 359.50   | 27.20 +/-                 |        |                               |         |
| 120A3 Pellet A | 2.28E+02                 | 0.08                 | 362.85   | 0.08                      | 22.7   | 28.44                         |         |
| 3871 Pellet A  | 5.36E+01                 | 57.47                | 366.25   | 365.31                    | 44.18  | 55.22                         | 18.40%  |
| 3871 Pellet A  | 5.69E+01                 | 4.20                 | 368.52   | 3.77 +/-                  |        |                               |         |
| 3871 Pellet A  | 6.19E+01                 | 0.07                 | 361.16   | 0.01                      | 3.3    | 4.07                          |         |
| 3877 Pellet A  | 3.40E+02                 | 330.54               | 348.80   | 362.64                    | 255.97 | 319.96                        | 106.61% |
| 3877 Pellet A  | 3.44E+02                 | 19.53                | 366.47   | 12.38 +/-                 |        |                               |         |
| 3877 Pellet A  | 3.08E+02                 | 0.06                 | 372.64   | 0.03                      | 17.5   | 21.83                         |         |
| C3 Pellet A    | 2.11E+02                 | 205.37               | 282.65   | 293.85                    | 196.27 | 245.34                        | 81.75%  |
| C3 Pellet A    | 2.03E+02                 | 4.79                 | 293.29   | 11.48 +/-                 |        |                               |         |
| C3 Pellet A    | 2.02E+02                 | 0.02                 | 305.60   | 0.04                      | 8.9    | 11.17                         |         |
| WT Pellet A    | 2.41E+02                 | 240.09               | 280.00   | 280.82                    | 240.09 | 300.12                        | 100.00% |
| WT Pellet A    | 2.37E+02                 | 2.94                 | 273.09   | 8.18 +/-                  |        |                               |         |
| WT Pellet A    | 2.42E+02                 | 1.2%                 | 2.89E+02 | 2.9%                      | 7.6    | 9.48                          |         |

# Culture Filtrate

ESAT6\_LAAAWGSSGSEAYR.T1

| Sample Name  | Light Area | AQUA Area | L/H Ratio | Stats            |
|--------------|------------|-----------|-----------|------------------|
| Blank        | 0          | 0.00E+00  | 0         |                  |
| 120A3 Soup A | 6.40E+04   | 2.01E+05  | 0.318051  | 0.318935 Average |
| 120A3 Soup A | 7.68E+04   | 2.44E+05  | 0.315353  | 0.004097 StDev   |
| 120A3 Soup A | 8.40E+04   | 2.60E+05  | 0.323403  | 1.3% %CV         |
| 3871 Soup A  | 2.16E+04   | 2.27E+05  | 0.095368  | 0.085801 Average |
| 3871 Soup A  | 1.85E+04   | 2.39E+05  | 0.077193  | 0.009126 StDev   |
| 3871 Soup A  | 2.03E+04   | 2.39E+05  | 0.084841  | 10.6% %CV        |
| 3877 Soup A  | 2.90E+04   | 1.74E+05  | 0.166648  | 0.156514 Average |
| 3877 Soup A  | 3.11E+04   | 2.10E+05  | 0.147834  | 0.00949 StDev    |
| 3877 Soup A  | 2.96E+04   | 1.91E+05  | 0.15506   | 6.1% %CV         |
| C3 Soup A    | 1.45E+05   | 2.46E+05  | 0.591779  | 0.594692 Average |
| C3 Soup A    | 1.43E+05   | 2.59E+05  | 0.550965  | 0.045253 StDev   |
| C3 Soup A    | 1.56E+05   | 2.43E+05  | 0.641331  | 7.6% %CV         |
| WT Soup A    | 1.49E+06   | 1.41E+05  | 10.56188  | 9.863688 Average |
| WT Soup A    | 1.75E+06   | 1.86E+05  | 9.424422  | 0.611337 StDev   |
| WT Soup A    | 1.77E+06   | 1.85E+05  | 9.604764  | 6.2% %CV         |

ESAT6\_TEQQWNFAGIEAASSAIQGNVTSISHLLDEGK.2y27

| Sample Name  | Light Area | AQUA Area | L/H Ratio | Stats             |
|--------------|------------|-----------|-----------|-------------------|
| Blank        | 0          | 0         | 0         |                   |
| 120A3 Soup A | 1.97E+04   | 5.72E+04  | 0.344514  | 0.2533245 Average |
| 120A3 Soup A | 1.68E+04   | 6.75E+04  | 0.249408  | 0.0892958 StDev   |
| 120A3 Soup A | 1.22E+04   | 7.32E+04  | 0.166052  | 35.2% %CV         |
| 3871 Soup A  | 4.83E+03   | 8.53E+04  | 0.056607  | 0.0478069 Average |
| 3871 Soup A  | 3.44E+03   | 7.99E+04  | 0.043104  | 0.007627 StDev    |
| 3871 Soup A  | 3.95E+03   | 9.05E+04  | 0.04371   | 16.0% %CV         |
| 3877 Soup A  | 4.17E+03   | 5.21E+04  | 0.08005   | 0.0520932 Average |
| 3877 Soup A  | 1.78E+03   | 6.36E+04  | 0.028025  | 0.0262295 StDev   |
| 3877 Soup A  | 3.21E+03   | 6.66E+04  | 0.048204  | 50.4% %CV         |
| C3 Soup A    | 5.50E+04   | 7.90E+04  | 0.695977  | 0.6103617 Average |
| C3 Soup A    | 4.93E+04   | 7.62E+04  | 0.647422  | 0.1089782 StDev   |
| C3 Soup A    | 4.73E+04   | 9.71E+04  | 0.487687  | 17.9% %CV         |
| WT Soup A    | 3.49E+05   | 6.16E+04  | 5.670237  | 4.9288776 Average |
| WT Soup A    | 3.50E+05   | 7.10E+04  | 4.938689  | 0.7463135 StDev   |
| WT Soup A    | 3.66E+05   | 8.76E+04  | 4.177707  | 15.1% %CV         |

Ac-ESAT6\_[Ac]TEQQWNFAGIEAASSAIQGNVTSISHLLDEGK.2y27

| Sample Name  | Light Area | AQUA Area | Stats                        |
|--------------|------------|-----------|------------------------------|
| Blank        | 0          | 0         |                              |
| 120A3 Soup A | 1.27E+04   | 1.02E+05  | 1.24E-01 0.148104529 Average |
| 120A3 Soup A | 1.88E+04   | 9.86E+04  | 1.91E-01 0.037257597 StDev   |
| 120A3 Soup A | 1.66E+04   | 1.29E+05  | 1.29E-01 25.2% %CV           |
| 3871 Soup A  | 7.13E+03   | 1.38E+05  | 5.17E-02 0.048154323 Average |
| 3871 Soup A  | 6.23E+03   | 1.39E+05  | 4.48E-02 0.00349742 StDev    |
| 3871 Soup A  | 7.65E+03   | 1.60E+05  | 4.80E-02 7.3% %CV            |
| 3877 Soup A  | 1.08E+04   | 8.87E+04  | 1.22E-01 0.097547533 Average |
| 3877 Soup A  | 1.07E+04   | 1.13E+05  | 9.44E-02 0.023311354 StDev   |
| 3877 Soup A  | 1.01E+04   | 1.33E+05  | 7.60E-02 23.9% %CV           |
| C3 Soup A    | 1.94E+04   | 1.49E+05  | 1.31E-01 0.148038931 Average |
| C3 Soup A    | 2.13E+04   | 1.40E+05  | 1.52E-01 0.015845233 StDev   |
| C3 Soup A    | 2.31E+04   | 1.43E+05  | 1.62E-01 10.7% %CV           |
| WT Soup A    | 1.83E+05   | 8.17E+04  | 2.24E+00 2.251047839 Average |
| WT Soup A    | 1.84E+05   | 8.53E+04  | 2.16E+00 0.096295554 StDev   |
| WT Soup A    | 1.89E+05   | 8.04E+04  | 2.35E+00 4.3% %CV            |

GroES\_EKPOEGTVWVGPGGR.T1

| Sample Name  | Light Area | AQUA Area | L/H      | Stats            |
|--------------|------------|-----------|----------|------------------|
| Blank        | 0          | 0         | 0        |                  |
| 120A3 Soup A | 5.69E+06   | 5.06E+06  | 1.125148 | 1.035007 Average |
| 120A3 Soup A | 7.48E+06   | 8.14E+06  | 0.919975 | 0.104827 StDev   |
| 120A3 Soup A | 7.72E+06   | 7.28E+06  | 1.059898 | 10.1% %CV        |
| 3871 Soup A  | 7.99E+06   | 7.32E+06  | 1.091803 | 1.086017 Average |
| 3871 Soup A  | 8.59E+06   | 7.89E+06  | 1.088638 | 0.007451 StDev   |
| 3871 Soup A  | 8.33E+06   | 7.73E+06  | 1.07761  | 0.7% %CV         |
| 3877 Soup A  | 3.28E+06   | 4.67E+06  | 0.701863 | 0.663679 Average |
| 3877 Soup A  | 4.47E+06   | 6.75E+06  | 0.662372 | 0.037548 StDev   |
| 3877 Soup A  | 4.65E+06   | 7.43E+06  | 0.626801 | 5.7% %CV         |
| C3 Soup A    | 4.28E+06   | 7.24E+06  | 0.590802 | 0.581168 Average |
| C3 Soup A    | 4.26E+06   | 7.22E+06  | 0.590412 | 0.016349 StDev   |
| C3 Soup A    | 4.21E+06   | 7.49E+06  | 0.562291 | 2.8% %CV         |
| WT Soup A    | 1.90E+06   | 4.66E+06  | 0.406565 | 0.382868 Average |
| WT Soup A    | 2.53E+06   | 6.86E+06  | 0.368989 | 0.020623 StDev   |
| WT Soup A    | 2.77E+06   | 7.44E+06  | 0.37305  | 5.4% %CV         |

Correction

|            |           |       |              |           |            |
|------------|-----------|-------|--------------|-----------|------------|
| 120 is     | 2.7033013 | of WT |              |           |            |
| 3871 is    | 2.8365317 | of WT |              |           |            |
| 3877 is    | 1.7334411 | of WT |              |           |            |
| C3 is      | 1.5179345 | of WT |              |           |            |
| WT is      | 1         | of WT |              |           |            |
|            |           |       | *25ul resusp |           |            |
|            |           |       | 2ul load     |           |            |
| Peptide    | Stock     | Dil   | Load (ul)    | pmol/tube | Oncolumn*  |
| GroES      | 130uM     |       | 500          | 5         | 1.3 0.13   |
| E6internal | 142uM     |       | 500          | 5         | 1.42 0.142 |

| Absolute Quant | in fmol/800ng CF |           |           |             | E6i Normalized | fmol /ug CF |         |
|----------------|------------------|-----------|-----------|-------------|----------------|-------------|---------|
| Sample Name    | ESAT6i           | Stats     | GroES     | Stats       | to GroES       |             |         |
| 120A3 Soup A   | 45.1632024       | 45.288835 | 146.26928 | 134.5509547 | 16.75          | 20.94       | 1.20%   |
| 120A3 Soup A   | 44.7801314       | 0.5817843 | 119.5968  | 13.62747737 | +/-            |             |         |
| 120A3 Soup A   | 45.9231717       | 1.3%      | 137.78678 | 10.1%       | 1.71           | 2.14        |         |
| 3871 Soup A    | 13.5423026       | 12.183703 | 141.93443 | 141.1822098 | 4.30           | 5.37        | 0.31%   |
| 3871 Soup A    | 10.9614035       | 1.2958369 | 141.52295 | 0.968631416 | +/-            |             |         |
| 3871 Soup A    | 12.0474037       | 10.6%     | 140.08925 | 0.7%        | 0.46           | 0.57        |         |
| 3877 Soup A    | 23.6639495       | 22.224997 | 91.242236 | 86.27826913 | 12.82          | 16.03       | 0.92%   |
| 3877 Soup A    | 20.9924798       | 1.3476457 | 86.108396 | 4.881247886 | +/-            |             |         |
| 3877 Soup A    | 22.0185632       | 6.1%      | 81.484175 | 5.7%        | 1.06           | 1.33        |         |
| C3 Soup A      | 84.03256         | 84.446216 | 76.804309 | 75.55189479 | 55.63          | 69.54       | 3.97%   |
| C3 Soup A      | 78.2370656       | 6.4259716 | 76.753499 | 2.125393685 | +/-            |             |         |
| C3 Soup A      | 91.0690222       | 7.6%      | 73.097877 | 2.8%        | 4.51           | 5.64        |         |
| WT Soup A      | 1499.78663       | 1400.6437 | 52.853465 | 49.77283024 | 1400.64        | 1750.80     | 100.00% |
| WT Soup A      | 1338.26789       | 86.809807 | 47.968522 | 2.680937071 | +/-            |             |         |
| WT Soup A      | 1363.87656       | 6.2%      | 48.496503 | 5.4%        | 115.01         | 143.76      |         |

eg 20.9 +/- 2.14

## Surface Proteins

ESAT6\_LAAAWGGSGSEAYR.T1

| Sample Name     | Light Area | AQUA Area | L/H Ratio | Stats                   |
|-----------------|------------|-----------|-----------|-------------------------|
| 120A3 Washate 1 | 1.84E+05   | 1.81E+05  | 1.02E+00  | 8.09E-01 <b>Average</b> |
| 120A3 Washate 1 | 3.28E+05   | 4.75E+05  | 6.89E-01  | 0.1799281 <b>StDev</b>  |
| 120A3 Washate 1 | 3.35E+05   | 4.64E+05  | 7.23E-01  | 22.2% <b>% CV</b>       |
| C3 Washate 1    | 9.64E+04   | 7.72E+05  | 1.25E-01  | 1.28E-01 <b>Average</b> |
| C3 Washate 1    | 1.00E+05   | 7.96E+05  | 1.26E-01  | 0.0047814 <b>StDev</b>  |
| C3 Washate 1    | 9.96E+04   | 7.46E+05  | 1.34E-01  | 3.7% <b>% CV</b>        |
| WT Washate 1    | 2.35E+05   | 3.71E+05  | 6.34E-01  | 5.96E-01 <b>Average</b> |
| WT Washate 1    | 2.89E+05   | 5.10E+05  | 5.65E-01  | 0.0349079 <b>StDev</b>  |
| WT Washate 1    | 3.27E+05   | 5.56E+05  | 5.88E-01  | 5.9% <b>% CV</b>        |

ESAT6\_TEQQWNFAGIEAASSAIQGNVTSISHLLDEGK2y27

| Sample Name     | Light Area | AQUA Area | L/H Ratio | Stats                   |
|-----------------|------------|-----------|-----------|-------------------------|
| 120A3 Washate 1 | 5.90E+04   | 2.53E+05  | 2.33E-01  | 2.09E-01 <b>Average</b> |
| 120A3 Washate 1 | 7.18E+04   | 3.20E+05  | 2.25E-01  | 0.0340442 <b>StDev</b>  |
| 120A3 Washate 1 | 6.09E+04   | 3.57E+05  | 1.70E-01  | 16.3% <b>% CV</b>       |
| C3 Washate 1    | 9.09E+03   | 1.73E+05  | 5.24E-02  | 6.29E-02 <b>Average</b> |
| C3 Washate 1    | 8.08E+03   | 1.38E+05  | 5.86E-02  | 0.0132045 <b>StDev</b>  |
| C3 Washate 1    | 8.33E+03   | 1.07E+05  | 7.77E-02  | 21.0% <b>% CV</b>       |
| WT Washate 1    | 2.95E+04   | 1.02E+05  | 2.89E-01  | 2.76E-01 <b>Average</b> |
| WT Washate 1    | 3.92E+04   | 1.51E+05  | 2.60E-01  | 0.0147746 <b>StDev</b>  |
| WT Washate 1    | 4.42E+04   | 1.58E+05  | 2.80E-01  | 5.3% <b>% CV</b>        |

ESAT6\_AcTEQQWNFAGIEAASSAIQGNVTSISHLLDEGK2y27

| Sample Name     | Light Area | AQUA Area | L/H Ratio | Stats                   |
|-----------------|------------|-----------|-----------|-------------------------|
| 120A3 Washate 1 | 1.24E+05   | 1.53E+05  | 8.14E-01  | 5.44E-01 <b>Average</b> |
| 120A3 Washate 1 | 1.13E+05   | 2.58E+05  | 4.36E-01  | 0.23531564 <b>StDev</b> |
| 120A3 Washate 1 | 1.15E+05   | 3.00E+05  | 3.82E-01  | 43.2% <b>% CV</b>       |
| C3 Washate 1    | 2.42E+04   | 2.41E+05  | 1.00E-01  | 6.77E-02 <b>Average</b> |
| C3 Washate 1    | 1.28E+04   | 2.11E+05  | 6.05E-02  | 0.02977108 <b>StDev</b> |
| C3 Washate 1    | 7.44E+03   | 1.76E+05  | 4.23E-02  | 44.0% <b>% CV</b>       |
| WT Washate 1    | 1.57E+04   | 1.37E+05  | 1.15E-01  | 1.24E-01 <b>Average</b> |
| WT Washate 1    | 2.21E+04   | 1.54E+05  | 1.44E-01  | 0.01733869 <b>StDev</b> |
| WT Washate 1    | 1.79E+04   | 1.58E+05  | 1.13E-01  | 14.0% <b>% CV</b>       |

Correction Factor Gro ES

|       |                |
|-------|----------------|
| 120A3 | 1.30E+00 of WT |
| C3    | 2.62E-01 of WT |
| WT    | 1.00E+00 of WT |

GroES\_EKPQEGTVVAVGPGR.T1

| Sample Name     | Light Area | AQUA Area | L/H Ratio | Stats                   |
|-----------------|------------|-----------|-----------|-------------------------|
| 120A3 Washate 1 | 1.84E+05   | 6.00E+06  | 3.06E-02  | 2.56E-02 <b>Average</b> |
| 120A3 Washate 1 | 3.28E+05   | 1.43E+07  | 2.28E-02  | 0.0043214 <b>StDev</b>  |
| 120A3 Washate 1 | 3.35E+05   | 1.43E+07  | 2.34E-02  | 16.9% <b>% CV</b>       |
| C3 Washate 1    | 9.64E+04   | 2.06E+07  | 4.69E-03  | 5.16E-03 <b>Average</b> |
| C3 Washate 1    | 1.00E+05   | 1.84E+07  | 5.46E-03  | 0.0004092 <b>StDev</b>  |
| C3 Washate 1    | 9.96E+04   | 1.87E+07  | 5.33E-03  | 7.9% <b>% CV</b>        |
| WT Washate 1    | 2.35E+05   | 1.12E+07  | 2.10E-02  | 1.97E-02 <b>Average</b> |
| WT Washate 1    | 2.89E+05   | 1.56E+07  | 1.85E-02  | 0.0012459 <b>StDev</b>  |
| WT Washate 1    | 3.27E+05   | 1.66E+07  | 1.96E-02  | 6.3% <b>% CV</b>        |

| Peptide    | Stock | Dil | Load (ul) | *25ul resusp |           | in fmol/50ul washate eqv. |        | E6i Normalized |          | nor to BCA** |        |
|------------|-------|-----|-----------|--------------|-----------|---------------------------|--------|----------------|----------|--------------|--------|
|            |       |     |           | pmol/tube    | Oncolumn* | ESAT6i                    | GroES  | to GroES       |          |              |        |
| GroES      | 130uM |     | 500       | 5            | 1.3       | 144.28                    | 114.91 | 3.98           | 3.33     | 88.23        | 56.96  |
| E6internal | 142uM |     | 500       | 5            | 1.42      | 97.82                     | 25.55  | 2.97           | 0.56 +/- |              | 1.55   |
|            |       |     |           |              |           | 102.62                    | 0.22   | 3.05           | 0.17     | 24.62        |        |
|            |       |     |           |              |           | 17.72                     | 18.18  | 0.61           | 0.67     | 69.38        | 284.35 |
|            |       |     |           |              |           | 17.86                     | 0.68   | 0.71           | 0.05 +/- |              | 0.24   |
|            |       |     |           |              |           | 18.96                     | 0.04   | 0.69           | 0.08     | 6.08         |        |
|            |       |     |           |              |           | 90.00                     | 84.57  | 2.72           | 2.56     | 84.57        | 150.22 |
|            |       |     |           |              |           | 80.29                     | 4.96   | 2.40           | 0.16 +/- |              | 0.56   |
|            |       |     |           |              |           | 83.43                     | 0.06   | 2.55           | 0.06     | 7.30         |        |

\*\* FM 2/10/2014 BCA Data

Yellow box is fmol protein per 1/2 washate (100ul total)  
Light green is fmol error (Propagated error of ESAT6 and GroES)

Relative Quantitation

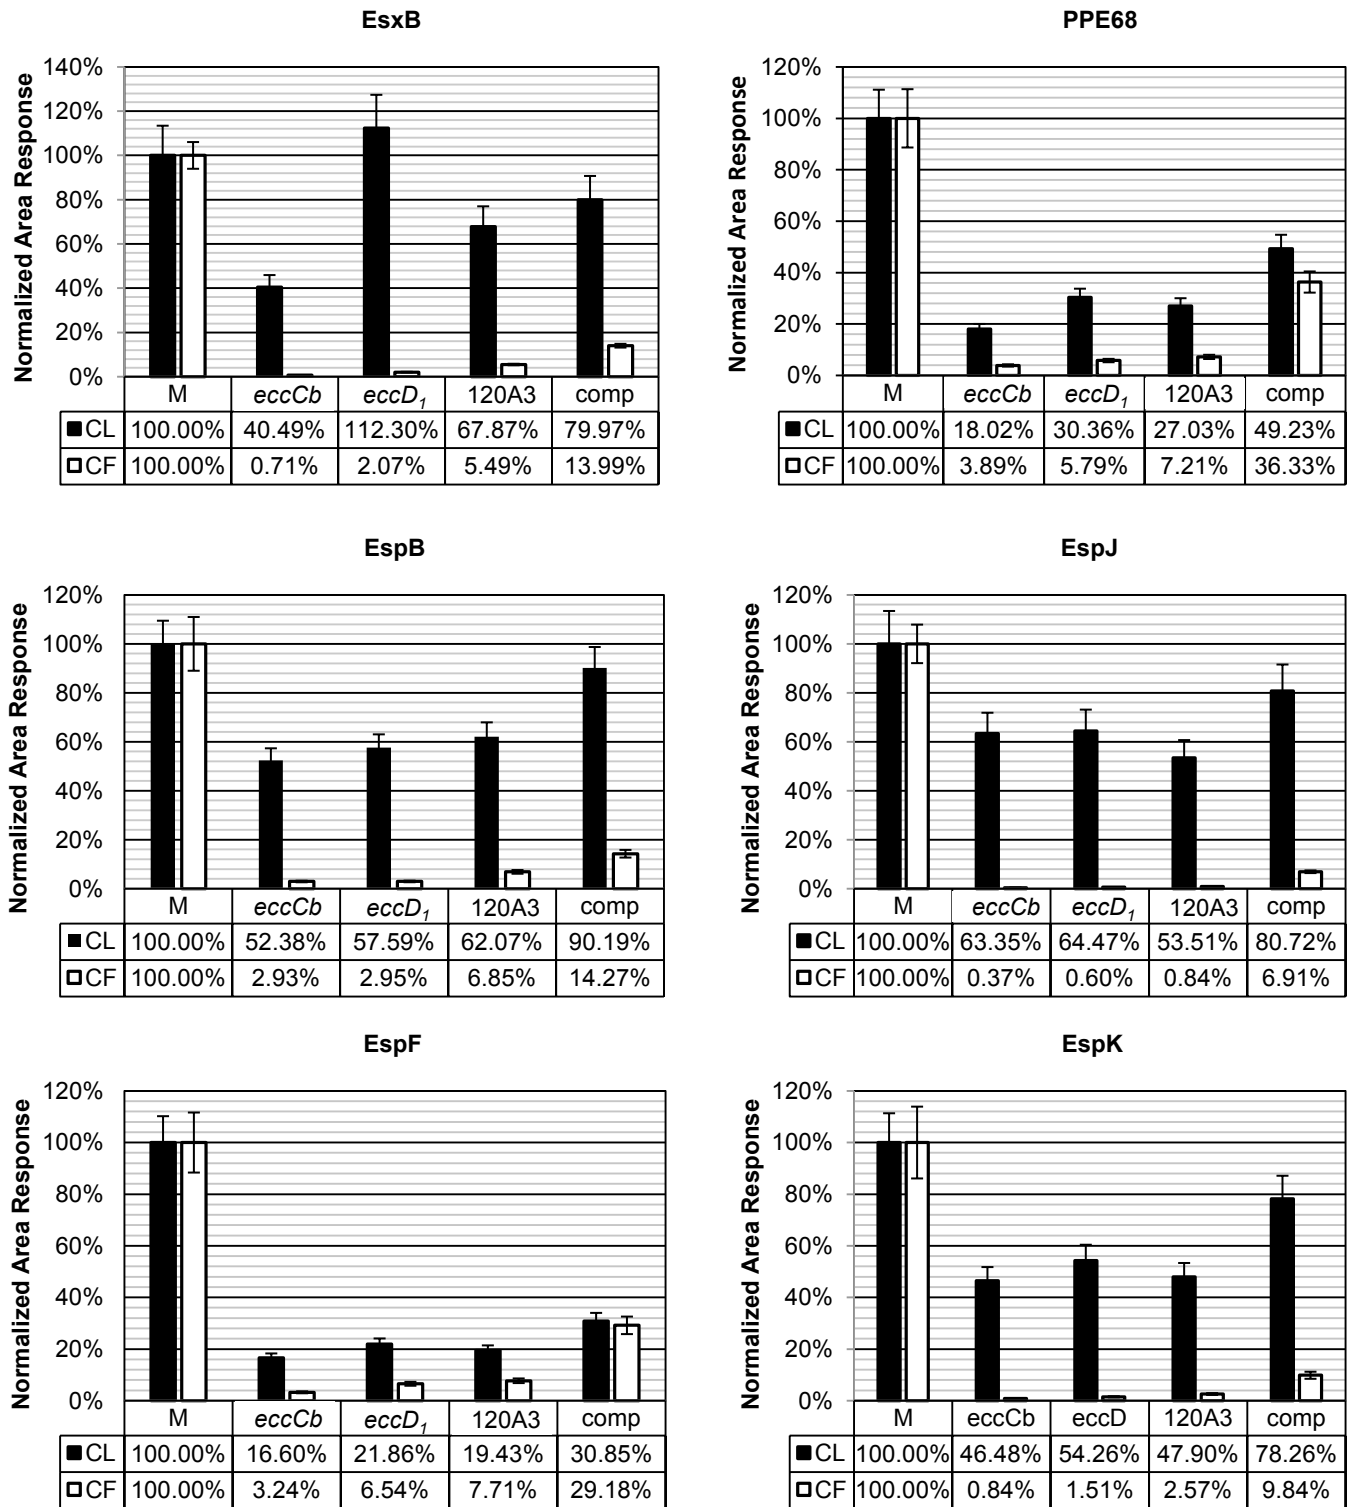

**Figure S5: MMAR\_0039 is required for the export of several Esx-1 substrates.** Relative levels of EsxB, PPE68, EspB, EspJ, EspF and EspK in CL and CF fractions generated from the *eccCb*, *eccD<sub>1</sub>*, 120A3, and complemented strains as compared to the WT (M) strain. Error bars represent the %CV.



**Figure S6: Spectra demonstrating N $\alpha$ - terminal acetylation of EspB and EspF:** Shown here are the annotated MS/MS spectra demonstrating NT-Acetylation of EspB (A&B), and EspF (C&D) substrates in *M. marinum*. Shown here for clarity only the y and b-type ions are annotated.

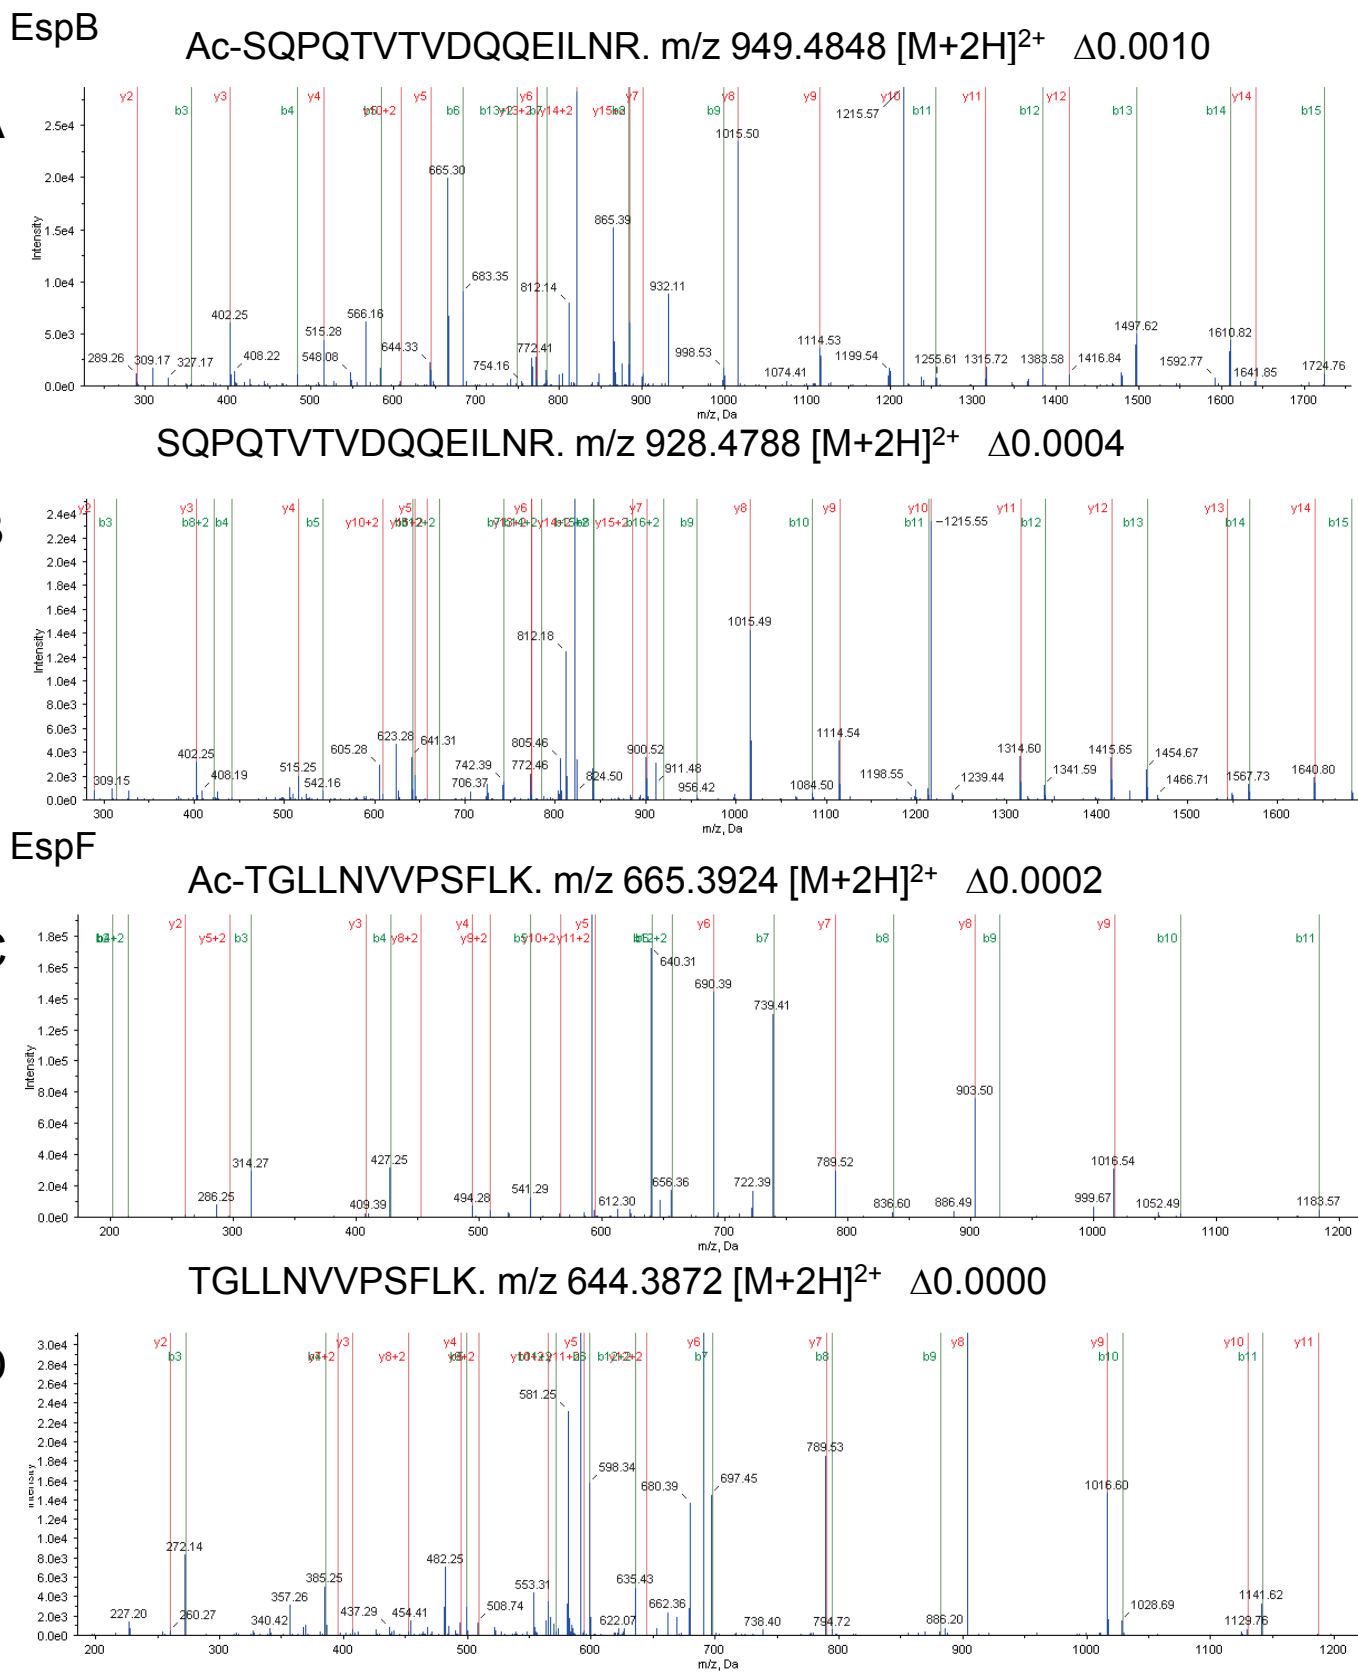

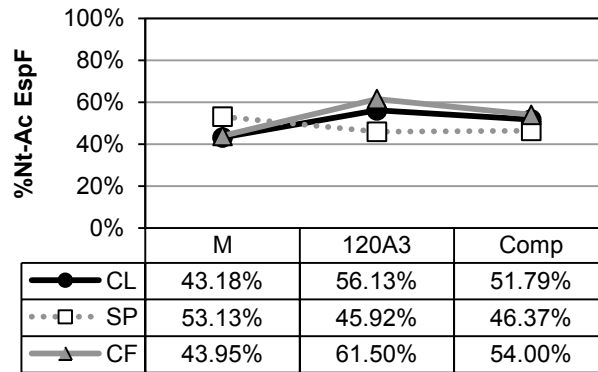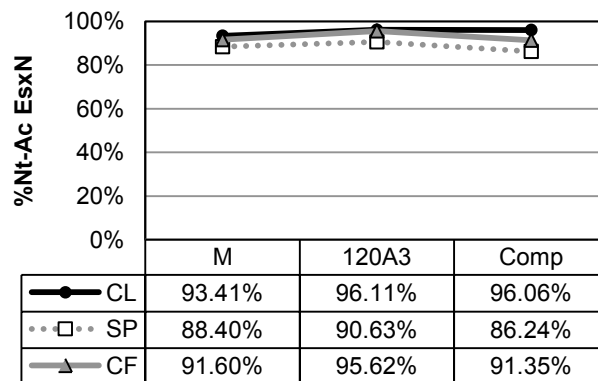

**Figure S7: Analysis of N $\alpha$ -terminal Ac EspF and EsxN peptides in the CL, CF and SP.**

Percentage of N- $\alpha$  terminal acetylation of EspF and EsxN in CL, CF and SP from *M. marinum* WT (M), 120A3 and complemented strains. % acetylation was calculated as the area ratio (N-t Ac peptide)/(area ratio Nt-Ac peptide + area ratio unacetylated Nt peptide) \* 100. The differences in % acetylation of EspF for all fractions between the WT and 120A3 strains were significantly different from each other using a student's t-test ( $p < 0.05$ ). The % acetylation in the complemented strain was also significantly different from the WT strain ( $p < 0.05$ ). For EsxN, the changes between the WT and 120A3 strain was significant for the CL and CF ( $p < 0.05$ ). ANOVA indicates there is no difference between the % acetylation at the cell surface ( $p = 0.4864$ ). The % acetylation of EsxN in the CF in the WT and complemented strains were not significantly different ( $p = 0.72$ ).
