# Supplementary material
Source: PubMed Central journal article supplement (PMC4249322)
Supplement: IAI.02153-14_zii999090922so2.pdf [file IAI.02153-14_zii999090922so2.pdf]

**Table S1. Strains, plasmids and oligonucleotides used in this study**

| Strain                             | Genotype                                                                                                                                                                                            | Reference or source   |
|------------------------------------|-----------------------------------------------------------------------------------------------------------------------------------------------------------------------------------------------------|-----------------------|
| <b><i>M. marinum</i> strain</b>    |                                                                                                                                                                                                     |                       |
| <b>M</b>                           | wild-type <i>M. marinum</i>                                                                                                                                                                         | ATCC                  |
| <b>120A3</b>                       | M strain bearing a Tn insertion in the <i>MMAR_0039</i> gene                                                                                                                                        | This study            |
| <b>120A3/ P<sub>MOP</sub>0039</b>  | Complemented; 120A3 strain bearing an integrating plasmid expressing <i>MMAR_0039</i> from the constitutive Mycobacterial Optimal Promoter (MOP)                                                    | This study            |
| <b><i>eccD</i><sub>1</sub>::Tn</b> | M strain bearing a Tn insertion in the <i>eccD</i> <sub>1</sub> gene; insertion site between bases 6594673/6594674 in <i>M. marinum</i> genome; Isolated from Library with smooth colony morphology | Laboratory collection |
| <b><i>eccCb</i>::Tn</b>            | M strain bearing a Tn insertion in the <i>eccCb</i> gene                                                                                                                                            | (1)                   |
| <b>Δ<i>esxBA</i></b>               | M strain bearing a genomic deletion of the <i>esxBA</i> genes                                                                                                                                       | (2)                   |
| <b>ΔRD1</b>                        | M strain bearing a genomic deletion including ' <i>eccCb</i> '- <i>espK</i>                                                                                                                         | (3)                   |

| Plasmid               | Genotype                                                                                                                                                                  | Reference or source                                                                                      |
|-----------------------|---------------------------------------------------------------------------------------------------------------------------------------------------------------------------|----------------------------------------------------------------------------------------------------------|
| <b>pMH406 Hyg</b>     | an integrating plasmid expressing <i>esxBA</i> from <i>M. tuberculosis</i> from the constitutive Mycobacterial Optimal Promoter (MOP); Parent for complementation plasmid | Original Plasmid from (4); Hygromycin resistant derivative was a gift from the Jeffery S. Cox laboratory |
| <b>pMB272B</b>        | suicide plasmid which carries the Mariner Tn                                                                                                                              | (5)                                                                                                      |
| <b>pBluescriptSK+</b> |                                                                                                                                                                           | Agilent Technologies, La Jolla CA                                                                        |

| Name          | Sequence (5'-3')                                 | Use                                                                                            | Reference or source |
|---------------|--------------------------------------------------|------------------------------------------------------------------------------------------------|---------------------|
| <b>opc242</b> | GCGTAAACGGGTGTCTATGGGCATCAG                      | Primer pair for construction of PMOP0039 complementation plasmid. Restriction sites underlined | This study          |
| <b>opc244</b> | GCTACGTACAGAATTCAGGAGTCCAGCATGA<br>CTGCCGACAGGAC |                                                                                                |                     |
| <b>821A</b>   | CGCATCTTCCCGACAACGCAGACCGTTCC                    | Primer pair for mapping the Mariner Transposon insertion site in the <i>M. marinum</i> genome  | (5)                 |
| <b>822A</b>   | TAATCGCGGCCTCGAGCAAGACGTTTCCCG                   |                                                                                                |                     |

|                                 |                          |                                                                                                     |            |
|---------------------------------|--------------------------|-----------------------------------------------------------------------------------------------------|------------|
| <b>ofm23</b>                    | ACCTTCACACCGCTACTTGG     | Primer pair for amplifying <i>MMAR_0040</i> for RT-PCR                                              | This study |
| <b>ofm24</b>                    | ATCACCAATTCTTCGGCAAA     |                                                                                                     |            |
| <b>ofm19</b>                    | AGGCGGGCAAGTACACGAT      | Primer pair for amplifying <i>MMAR_0039</i> for RT-PCR; flanks the Tn insertion in the 120A3 strain | This study |
| <b>ofm20</b>                    | TTGCAGGGCTTCTCCAC        |                                                                                                     |            |
| <b>opc235</b>                   | GGCAGCATCCAGCGCAATTC     | Primer pair for amplifying <i>esxA</i> for RT-PCR                                                   | This study |
| <b>opc236</b>                   | CCTTCGTCGGAGTTCAGATA     |                                                                                                     |            |
| <b>IFN-<math>\beta</math>-F</b> | CTGGAGCAGCTGAATGGAAAG    | Primer pair for amplifying IFN- $\beta$ for qRT-PCR                                                 | (6)        |
| <b>IFN-<math>\beta</math>-R</b> | CTTGAAGTCCGCCCTGTAGGT    |                                                                                                     |            |
| <b>GAPDH-F</b>                  | TCTCCCTCACAATTTCCATCCAG  | Primer pair for amplifying GAPDH for qRT-PCR                                                        | This study |
| <b>GAPDH-R</b>                  | GGGTGCAGCGAACTTTATTGATGG |                                                                                                     |            |

1. **Carlsson F, Joshi SA, Rangell L, Brown EJ.** 2009. Polar localization of virulence-related Esx-1 secretion in mycobacteria. *PLoS pathogens* **5**:e1000285.
2. **Gao LY, Guo S, McLaughlin B, Morisaki H, Engel JN, Brown EJ.** 2004. A mycobacterial virulence gene cluster extending RD1 is required for cytolysis, bacterial spreading and ESAT-6 secretion. *Molecular microbiology* **53**:1677-1693.
3. **Volkman HE, Clay H, Beery D, Chang JC, Sherman DR, Ramakrishnan L.** 2004. Tuberculous granuloma formation is enhanced by a mycobacterium virulence determinant. *PLoS biology* **2**:e367.
4. **Guinn KM, Hickey MJ, Mathur SK, Zakei KL, Grotzke JE, Lewinsohn DM, Smith S, Sherman DR.** 2004. Individual RD1-region genes are required for export of ESAT-6/CFP-10 and for virulence of *Mycobacterium tuberculosis*. *Molecular microbiology* **51**:359-370.
5. **Gao LY, Groger R, Cox JS, Beverley SM, Lawson EH, Brown EJ.** 2003. Transposon mutagenesis of *Mycobacterium marinum* identifies a locus linking pigmentation and intracellular survival. *Infection and immunity* **71**:922-929.
6. **Stanley SA, Johndrow JE, Manzanillo P, Cox JS.** 2007. The Type I IFN response to infection with *Mycobacterium tuberculosis* requires ESX-1-mediated secretion and contributes to pathogenesis. *J Immunol* **178**:3143-3152.
